# Supplementary material for: Enrichment of beneficial bacteria in the skin microbiota of bats persisting with white-nose syndrome
Source: PubMed Central journal article supplement (PMC5584028; doi:10.1186/s40168-017-0334-y), 2017-09-05

**A**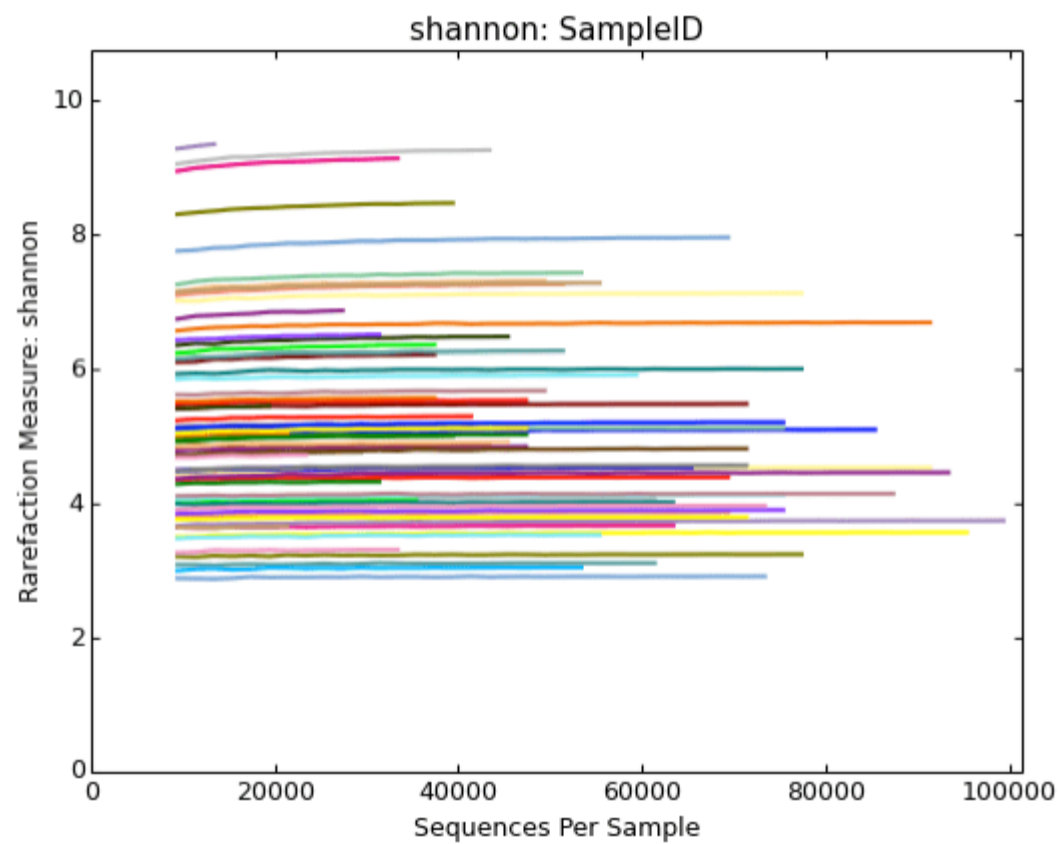**C**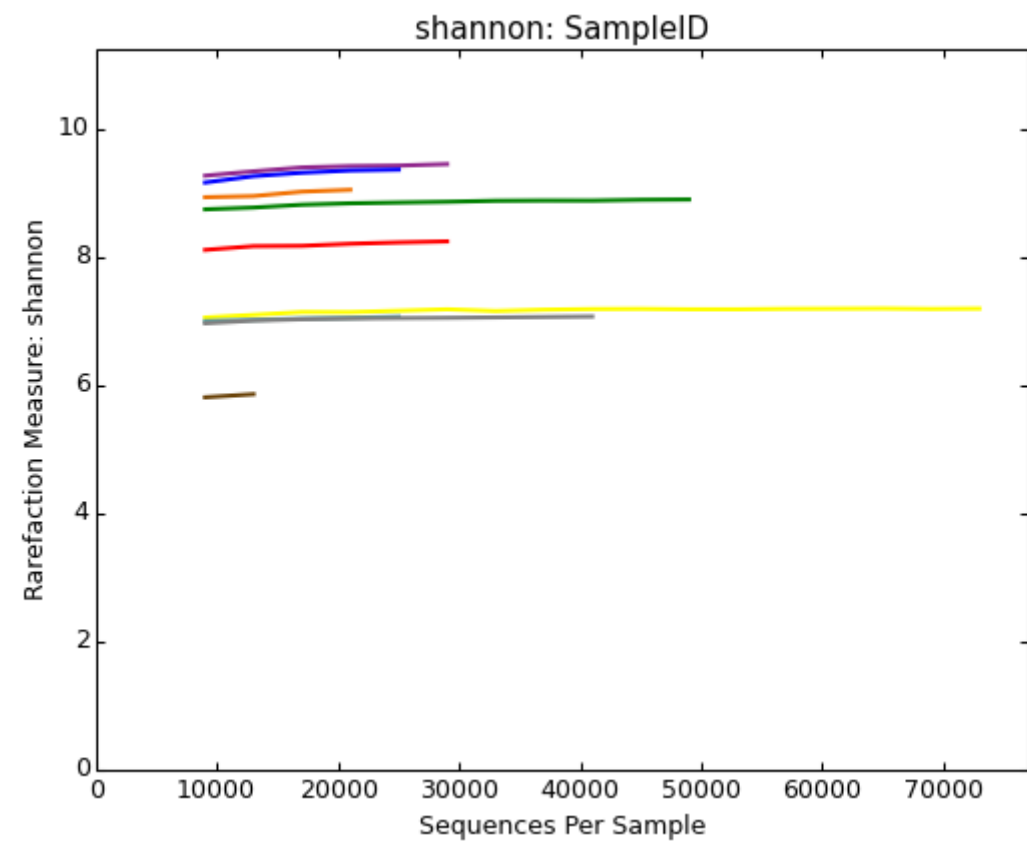**B**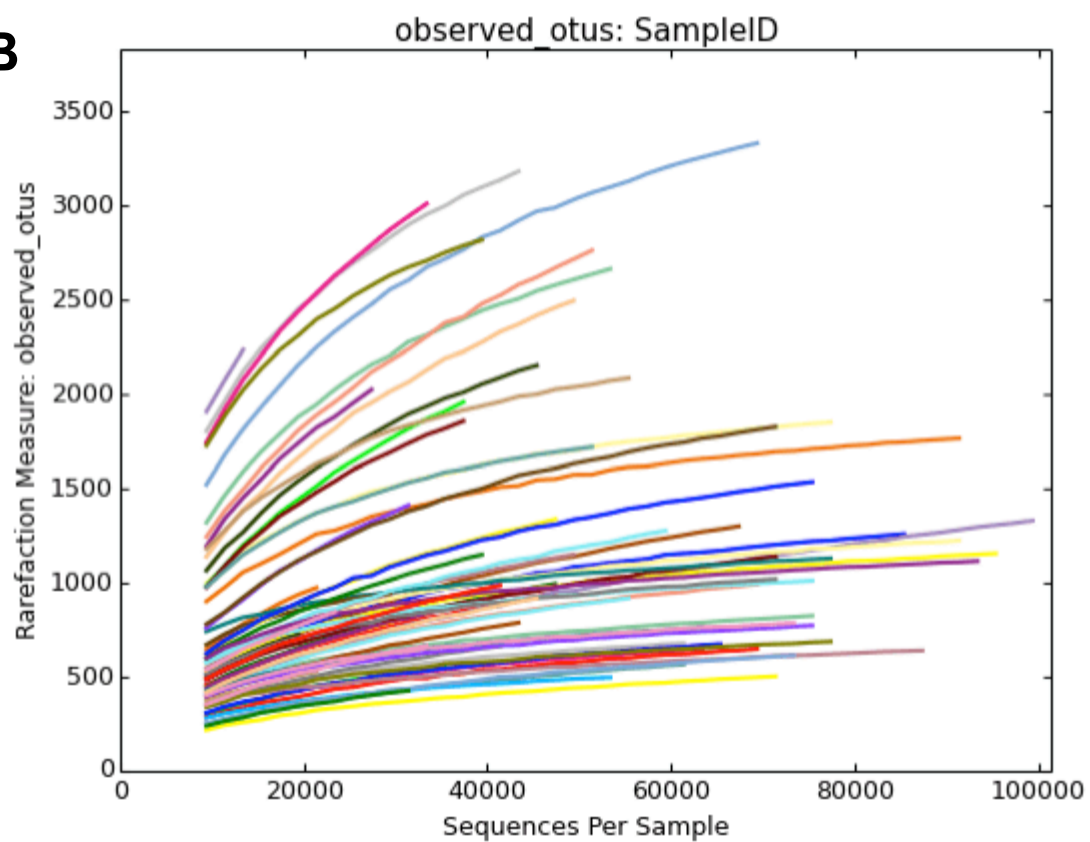**D**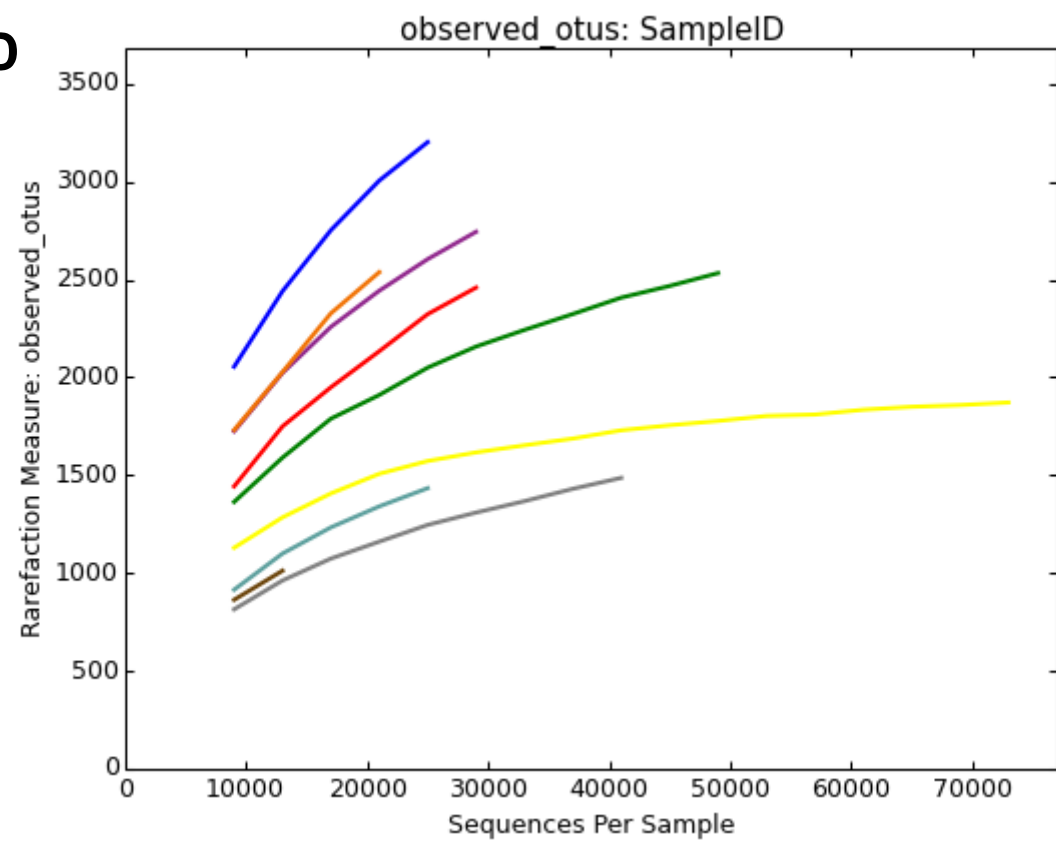

Supplement: 40168_2017_334_MOESM4_ESM.pdf [file 40168_2017_334_MOESM4_ESM.pdf]
